# Supplementary material
Source: Research Square preprint supplement (doi:10.21203/rs.3.rs-9542048/v1)
Supplement: Supplementary file 1 [file e54af38186ad6562be0a5aa9.docx]

**Supporting information**

Effect of the Substitution and Crosslinking Degrees of Dextran-Based Single-Chain Polymeric Nanoparticles (DXT-SCPN) on Their Interaction with Apramycin

J.C. Ibáñez, J. Movellan, I. Lozain, J. M. Ortiz de Zarate, D. Dupin

Figure S1: Transition temperature (ºC) of DXT-MA (DS =75%) before (DXT-MA) and after (DXT-SCPN) of the crosslinking with DODT (in PBS 1X at pH 7.0).

Figure S2: Lower Critical Solution Temperature (LCST) of DXT-MA dissolved in PBS at 10 mg/mL in function of DS. LCST was established by DLS when the polymers formed aggregates (PDI > 0.5 and size > 20 nm.).

Figure 3S: Hydrolysis degree (%) of DXT-SCPNapry after freeze-drying at 50 mg/mL. Orange rectangles indicate the hydrolysis of the polymer (corresponding to the diacidic molecules). % of hydrolysis was calculated respect of the methyl group of the polymer (around 1 ppm).

Table 1S: Summary of the surface tension (ST) of aqueous solution of free apramycin at different concentration and pH 7.0. The ST was measured using the Du Noüy method at 25ºC. Results are shown as Mean ± Standard deviation (n=3 measures).

| Apramycin concentration (mg/mL) | ST (mN/m) |
| --- | --- |
| 150 | 66.86 ± 0.23 |
| 75 | 70.85 ± 0.84 |
| 45 | 72.87 ± 0.17 |
| 20 | 73.79 ± 0.17 |
| 15 | 70.87 ± 2.49 |
| 10 | 73.93 ± 0.04 |

Figure S4: Cell viability assessment of apramycin alone at different concentrations. The samples were incubated during 48 hours with the cell line A549. % of cell viability was calculated regard non-treat cell as control. Statistic bars show the standard desviation of 4 replicates.
